# Supplementary material
Source: PubMed Central journal article supplement (PMC9017299)
Supplement: jb.00602-21-s0001.pdf [file jb.00602-21-s0001.pdf]

**Supplemental Material for:**

Use of an inter-species chimeric receptor for inducible gene expression reveals that metabolic flux through the peptidoglycan biosynthesis pathway is an important driver of cephalosporin resistance in *Enterococcus faecalis*

**Authors:** Carly A. Mascari, Dušanka Djorić, Jaime L. Little, and Christopher J. Kristich\*

**Running title:** Peptidoglycan synthesis drives enterococcal cephalosporin resistance

**Affiliation:**

Department of Microbiology and Immunology

Center for Infectious Disease Research

Medical College of Wisconsin

8701 Watertown Plank Rd

Milwaukee, WI 53226

\*For correspondence: [ckristich@mcw.edu](mailto:ckristich@mcw.edu)

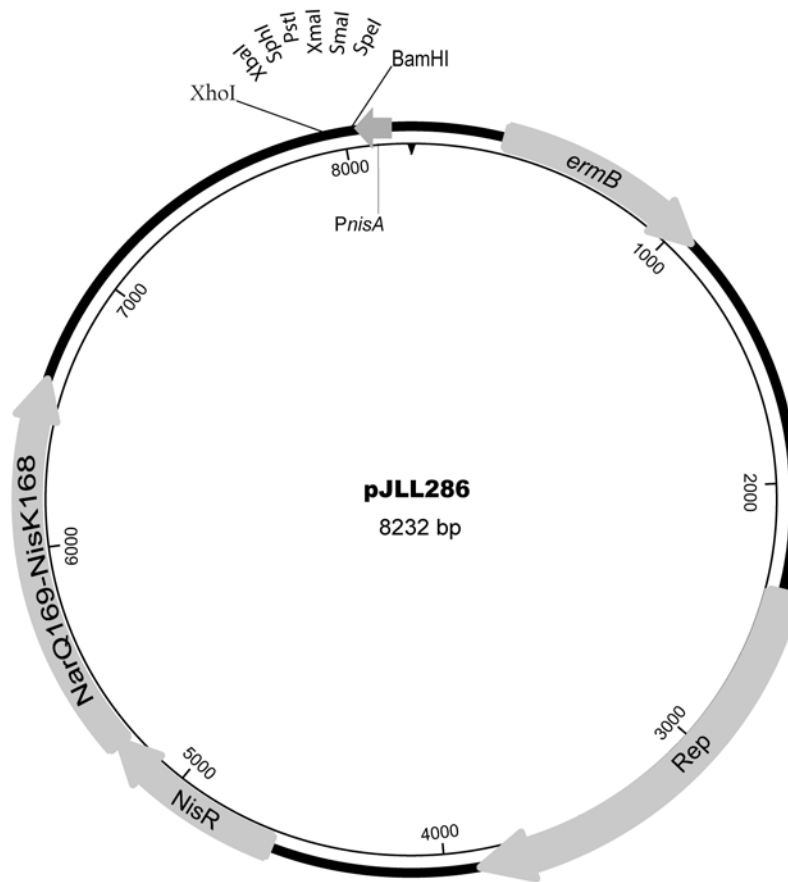

**Supplemental figure 1. Map of the nitrate-inducible expression plasmid pJLL286.**

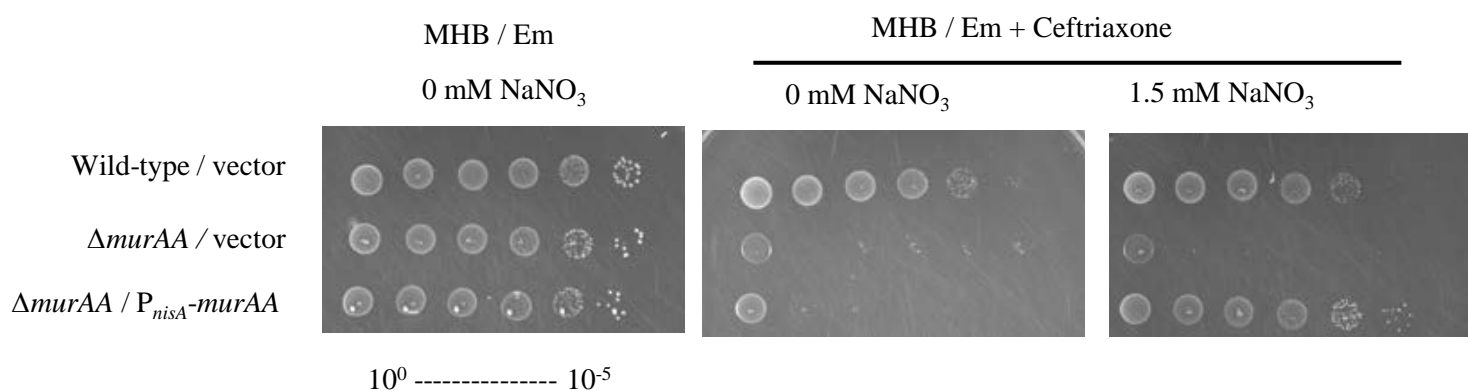

**Supplemental figure 2. Nitrate-inducible expression of MurAA rescues the ceftriaxone resistant defect of the  $\Delta murAA$  mutant on agar plates.** Cultures were subjected to 10-fold serial dilutions and spotted on MHB supplemented as indicated and incubated at 37 °C for 24 h. Results are representative of a minimum of 2 independent biological replicates. Strains were Wild-type/vector, OG1/pJLL286;  $\Delta murAA$ /vector, JL626/pJLL286; and  $\Delta murAA$ /P<sub>nisA</sub>-*murAA*, JL626/pJLL288.



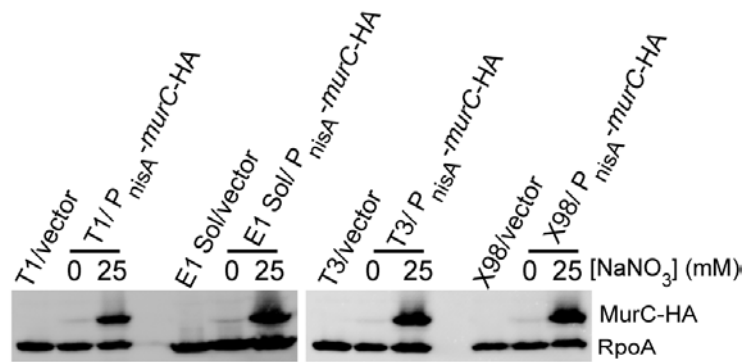

**Supplemental figure 4. NarQ169-NisK168 mediates nitrate-responsive expression in multiple evolutionarily diverse lineages of *E. faecalis*.** Immunoblot analysis with anti-HA antibody for MurC-HA in total protein lysates from exponentially growing *E. faecalis* cells with varying  $\text{NaNO}_3$  concentrations as indicated. RpoA was used as a loading control. Results are representative of a minimum of 2 independent biological replicates. Strains were *E. faecalis* T1, E1 Sol, T3, or X98 carrying either pJLL286 (vector) or pJLL294 ( $P_{nisA}$ -*murC-HA*).

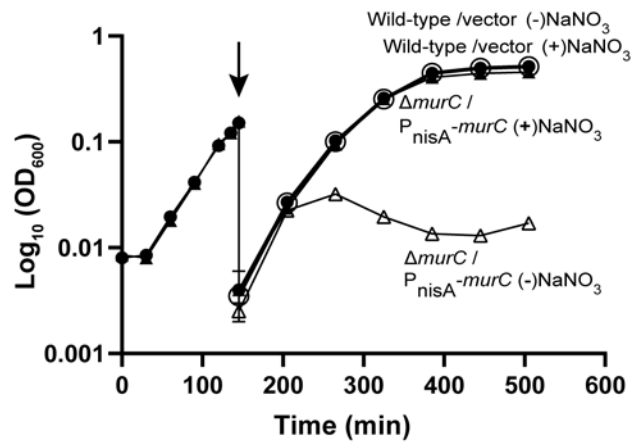

**Supplemental figure 5. MurC is essential for growth.** Cultures were grown to exponential phase in the presence of 5 mM  $\text{NaNO}_3$ , then washed (arrow) and suspended in media with or without 5 mM  $\text{NaNO}_3$ . Strains were, Wild-type/vector (circles), OG1/pJLL286;  $\Delta murC / P_{nisA-murC}$  (triangles), JL657/pJLL297. Open symbols, no  $\text{NaNO}_3$ , closed symbols, 5 mM  $\text{NaNO}_3$ . Data represent two biological replicates for each strain. Error bars are present but too small to be seen.

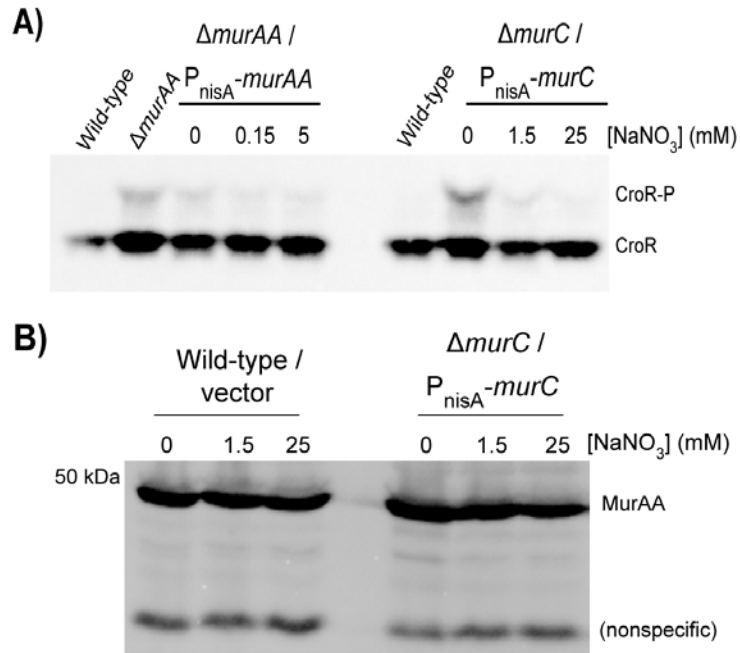

**Supplemental figure 6. Immunoblot analysis of the MurC depletion strain.** (A) Phos-tag SDS-PAGE and immunoblot analysis of total protein lysates from exponentially growing *E. faecalis* cells in the presence of varying  $NaNO_3$  concentrations as indicated reveals activation of CroS/R signaling upon depletion of MurC, reflected by the presence of phosphorylated CroR (CroR-P) that migrates more slowly than unphosphorylated CroR during Phos-tag SDS-PAGE. Activation of CroS/R signaling is also observed upon deletion of MurAA, indicating that impairment of PG synthesis at either step triggers CroS/R activation. (B) Immunoblot analysis for MurAA reveals that MurAA is present upon depletion of MurC. Results are representative of a minimum of 2 independent biological replicates. Strains were Wild-type (OG1),  $\Delta murAA$  (JL626), or  $\Delta murC$  (JL657) carrying empty vector (pJLL286), pJLL288 ( $P_{nisA}^{-murAA}$ ), or pJLL297 ( $P_{nisA}^{-murC}$ ) as indicated.

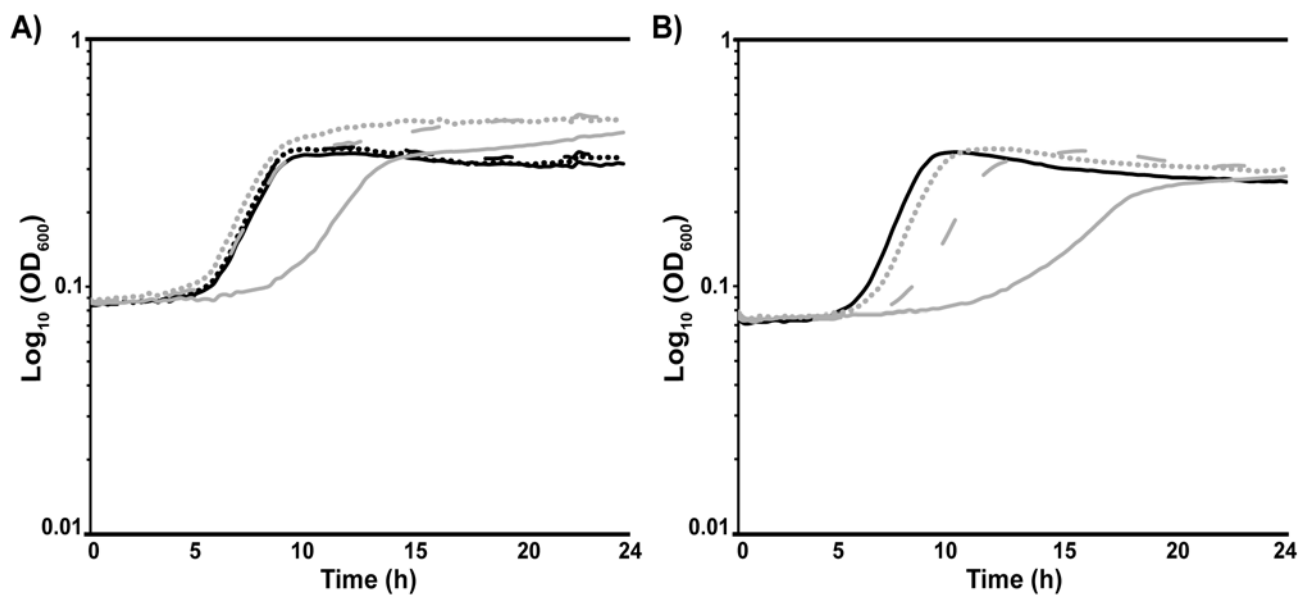

**Supplemental figure 7.** Growth of the MurC (A) and MurJ (B) depletion strains at inducer concentrations used for MIC analysis. Strains were (A) wild-type/vector, OG1/pJLL286 (black lines);  $\Delta\text{murC}/P_{\text{nisA}}\text{-murC}$ , JL657/pJLL297 (gray lines) at 2 (solid lines), 5 (dashed lines), and 12 (dotted lines) mM  $\text{NaNO}_3$ ; and (B) wild-type/vector, OG1/pJLL286 (black line);  $\Delta\text{murJ}/P_{\text{nisA}}\text{-murJ}$ , JL656/pJLL296 (gray lines) at 0 (solid lines), 0.1 (dashed lines), and 5 (dotted lines) mM  $\text{NaNO}_3$ .



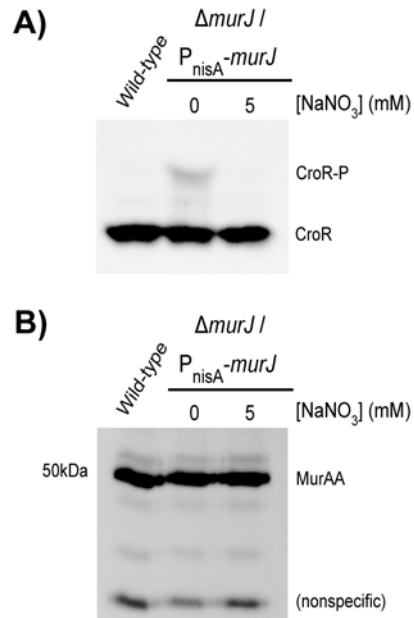

**Supplemental figure 8. Immunoblot analysis of the MurJ depletion strain.** (A) Phos-tag SDS-PAGE and immunoblot analysis of total protein lysates from exponentially growing *E. faecalis* cells in the presence or absence of 5mM NaNO<sub>3</sub> reveals activation of CroS/R signaling upon depletion of MurJ, reflected by the presence of phosphorylated CroR (CroR-P) that migrates more slowly than unphosphorylated CroR during Phos-tag SDS-PAGE. (B) Immunoblot analysis for MurAA reveals that MurAA is present upon depletion of MurJ. Results are representative of a minimum of 2 independent biological replicates. Strains were Wild-type/vector, OG1/pJLL286; and  $\Delta murJ/P_{nisA}$ - $murJ$ , JL656/pJLL296 as indicated.
